# Supplementary material for: Mn substituted MnxZn1−xCo2O4 oxides synthesized by co-precipitation; effect of doping on the structural, electronic and magnetic properties
Source: Royal Society of Chemistry journal article supplement (doi:10.1039/c8ra08150f), 2018-01-01
Supplement: c8ra08150f1.pdf [file c8ra08150f1.pdf]

## **Mn substituted $Mn_xZn_{1-x}Co_2O_4$ oxides synthesized by co-precipitation; effect of doping on the structural, electronic and magnetic properties**

Tarekegn Heliso Dolla<sup>a</sup>, David G. Billing<sup>b</sup>, Charles Sheppard<sup>c</sup>, Aletta Prinsloo<sup>c</sup>, Emanuela Carleschi<sup>d</sup>, Bryan P. Doyle<sup>d</sup>, Karin Pruessner<sup>e</sup>, Patrick Ndungu<sup>a\*</sup>

<sup>a</sup> Energy, Sensors and Multifunctional Nanomaterials Research Group, Department of Applied Chemistry, University of Johannesburg, Doornfontein Campus, South Africa

<sup>b</sup> DST-NRF Centre of Excellence in Strong Materials and Molecular Sciences Institute, School of Chemistry, University of the Witwatersrand, Johannesburg, South Africa

<sup>c</sup> Chromium Research Group, Department of Physics, University of Johannesburg, Auckland Park, South Africa

<sup>d</sup> Department of Physics, University of Johannesburg, Auckland Park, South Africa

<sup>e</sup> School of Chemistry and Physics, University of KwaZulu-Natal, Durban, South Africa

\*Corresponding author. E-mail address: pndungu@uj.ac.za (P. Ndungu)

## **Supporting information**

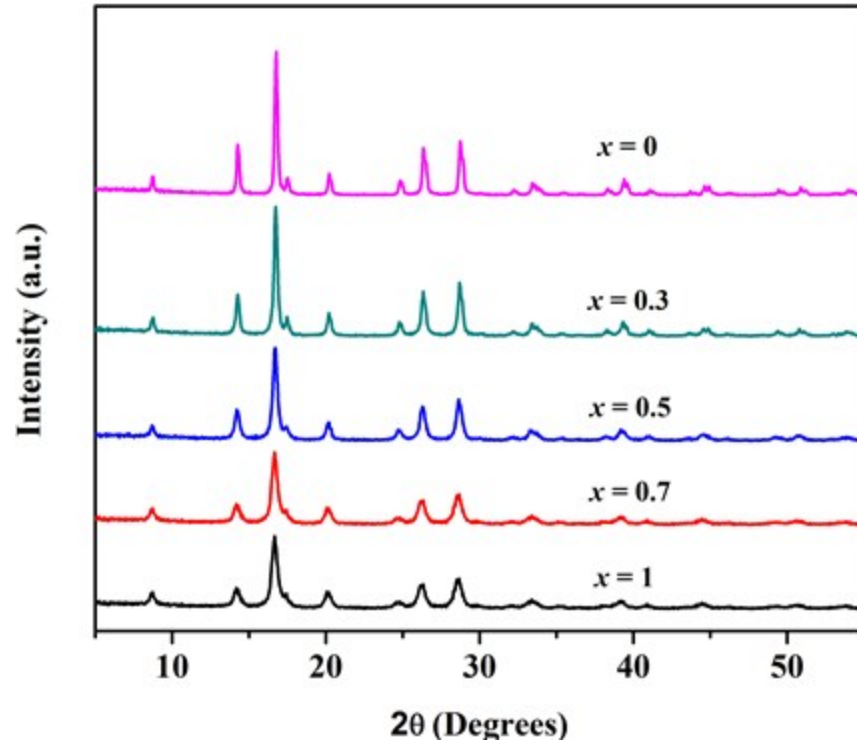

**Fig. S-1:** XRD pattern of  $\text{Mn}_x\text{Zn}_{1-x}\text{Co}_2\text{O}_4$  measured using a D9 diffractometer (XRD; Mo  $K\alpha 1$  radiation,  $\lambda = 0.709321 \text{ \AA}$ ).

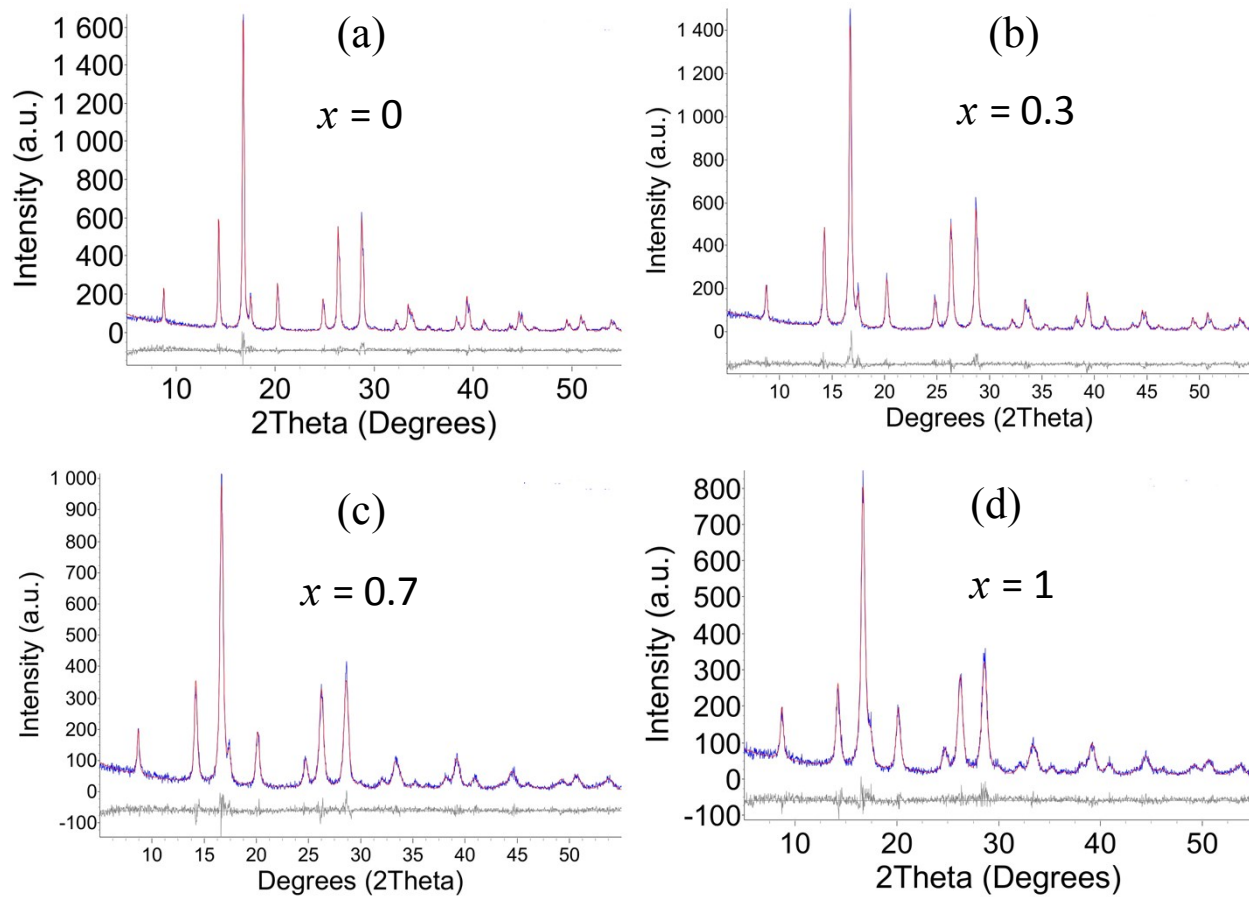

**Fig. S-2:** Rietveld refined XRD patterns for samples (a)  $\text{ZnCo}_2\text{O}_4$  ( $x = 0$ ), (b)  $\text{Mn}_{0.3}\text{Zn}_{0.7}\text{Co}_2\text{O}_4$  ( $x = 0.3$ ), (c)  $\text{Mn}_{0.7}\text{Zn}_{0.3}\text{Co}_2\text{O}_4$  ( $x = 0.7$ ), and (d)  $\text{MnCo}_2\text{O}_4$  ( $x = 1$ )
